# Supplementary material for: Complete Genome Sequencing of Leptospira interrogans Isolates from Malaysia Reveals Massive Genome Rearrangement but High Conservation of Virulence-Associated Genes
Source: MDPI journal article supplement (doi:10.3390/pathogens10091198), 2021-09-15
Supplement: s1 [file s1]

**Table S5. *In silico* DNA-DNA hybridization (DDH) of six *L. interrogans* isolates compared with the reference genome *L. interrogans* ATCC 43642.**

| Reference genome | DDH  | Model confidence interval | Distance | Probable DDH $\geq 70\%$ | G+C difference |
|------------------|------|---------------------------|----------|--------------------------|----------------|
| <b>Langkawi</b>  | 93   | [91.1 - 94.6%]            | 0.0088   | 96.71                    | 0.21           |
| <b>782</b>       | 92.8 | [90.8 - 94.3%]            | 0.0091   | 96.64                    | 0.19           |
| <b>898</b>       | 98.4 | [97.7 - 98.9%]            | 0.0025   | 97.95                    | 0.03           |
| <b>1489</b>      | 92.2 | [90.2 - 93.9%]            | 0.0097   | 96.49                    | 0.13           |
| <b>1548</b>      | 91.3 | [89.2 - 93.1%]            | 0.0107   | 96.22                    | 0.15           |
| <b>1530</b>      | 93.4 | [91.5 - 94.9%]            | 0.0084   | 96.8                     | 0.01           |
