# Supplementary material for: Complete Genome Sequencing of Leptospira interrogans Isolates from Malaysia Reveals Massive Genome Rearrangement but High Conservation of Virulence-Associated Genes
Source: MDPI journal article supplement (doi:10.3390/pathogens10091198), 2021-09-15
Supplement: s1 [file s1]

**Table S7. List of *L. interrogans* strains used in SNP genotyping.** Whole genome sequences of eight strains were downloaded from NCBI GeneBank. 15 other Malaysian strains were obtained from Leptospira Reference Center, Amsterdam, and draft genomes were generated in this study.

| No | Serovar             | Strain         | Source     |
|----|---------------------|----------------|------------|
| 1  | Lai                 | 56601          | NCBI       |
| 2  | Lai                 | IPAV           | NCBI       |
| 3  | Hardjo              | Norma          | NCBI       |
| 4  | Manilae             | NIID-HP        | NCBI       |
| 5  | Manilae             | NIID-LP        | NCBI       |
| 6  | Copenhageni         | Fiocruz L1-130 | NCBI       |
| 7  | Linhai              | 56609          | NCBI       |
| 8  | Bratislave          | PigK151        | NCBI       |
| 9  | Abramis             | Abraham        | This study |
| 10 | Autumnalis          | Akiyami A      | This study |
| 11 | Australis           | Ballico        | This study |
| 12 | Bataviae            | Swart          | This study |
| 13 | Biggis              | Biggs          | This study |
| 14 | Birkini             | Birkin         | This study |
| 15 | Djasiman            | Djasiman       | This study |
| 16 | Evansi              | 267-1348       | This study |
| 17 | Gurungi             | Gurung         | This study |
| 18 | Haemolytica         | Sejroe         | This study |
| 19 | Icterohaemorrhagiae | RGA            | This study |
| 20 | Muelleri            | RM2            | This study |
| 21 | Pomona              | Pomona         | This study |
| 22 | Ricardi             | Richarson      | This study |
| 23 | Smithi              | Smith          | This study |
