# Supplementary material for: Complete Genome Sequencing of Leptospira interrogans Isolates from Malaysia Reveals Massive Genome Rearrangement but High Conservation of Virulence-Associated Genes
Source: MDPI journal article supplement (doi:10.3390/pathogens10091198), 2021-09-15
Supplement: s1 [file s1]

| Table S2: Summary of serogroup typing by microscopic agglutination test with polyclonal reference anti-sera <sup>§</sup> |                                                                                |         |
|--------------------------------------------------------------------------------------------------------------------------|--------------------------------------------------------------------------------|---------|
| Strain                                                                                                                   | Serogroup typing with reference polyclonal anti-sera                           | Titre   |
| 782                                                                                                                      | Serogroup Ballum, serovar <i>Kenya</i> , strain Njenga                         | 1:80    |
|                                                                                                                          | Serogroup Canicola, serovar <i>Canicola</i> , strain Hond Utrecht IV           | 1:1280  |
|                                                                                                                          | Serogroup Icterohaemorrhagiae, serovar <i>Copenhageni</i> , strain Wijnberg    | 1:40    |
|                                                                                                                          | Serogroup Javanica, serovar <i>Poi</i> , strain Poi                            | 1:80    |
| 898                                                                                                                      | Serogroup Icterohaemorrhagiae, serovar <i>Copenhageni</i> , strain M20         | 1:10240 |
|                                                                                                                          | Serogroup Icterohaemorrhagiae, serovar <i>Icterohaemorrhagiae</i> , strain RGA | 1:10240 |
|                                                                                                                          | Serogroup Sarmin, serovar <i>Weaveri</i> , strain CZ 390                       | 1:1280  |
| 1489                                                                                                                     | Serogroup Bataviae, serovar <i>Bataviae</i> , strain Swart                     | 1:2560  |
|                                                                                                                          | Serogroup Djasiman, serovar <i>Djasiman</i> , strain Djasiman                  | 1:80    |
| 1548                                                                                                                     | Serogroup Bataviae, serovar <i>Bataviae</i> , strain Swart                     | 1:2560  |
|                                                                                                                          | Serogroup Tarassovi, serovar <i>Rama</i> , strain 316                          | 1:1520  |
|                                                                                                                          | Serogroup Tarassovi, serovar <i>Tarassovi</i> , strain Perepelitsin            | 1:160   |
| 1530                                                                                                                     | Serogroup Icterohaemorrhagiae, serovar <i>Copenhageni</i> , strain M20         | 1:10240 |
|                                                                                                                          | Serogroup Icterohaemorrhagiae, serovar <i>Icterohaemorrhagiae</i> , strain RGA | 1:320   |
|                                                                                                                          | Serogroup Pyrogenes, serovar <i>Pyrogenes</i> , strain Salinem                 | 1:80    |
|                                                                                                                          | Serogroup Sarmin, serovar <i>Weaveri</i> , strain CZ 390                       | 1:640   |

<sup>§</sup> Australis, Autumnalis, Ballum, Bataviae, Canicola, Celledoni, Cynopteri, Djasiman, Grippotyphosa, Hebdomadis, Icterohaemorrhagiae Javanica, Louisiana, Manhao, Mini, Panama, Pomona, Pyrogenes, Sarmin, Sejroe, Shermani, Tarassovi, Semarang, Hurstbridge, Leptonema, Ranarum, Genomospecies 1 Sichuan 79601, Difco contaminant, Lyme.
