# Supplementary material for: Complete Genome Sequencing of Leptospira interrogans Isolates from Malaysia Reveals Massive Genome Rearrangement but High Conservation of Virulence-Associated Genes
Source: MDPI journal article supplement (doi:10.3390/pathogens10091198), 2021-09-15
Supplement: s1 [file s1]

Table S4. Summary of cross agglutinin absorption tests (CAAT) performed on strain 782.

| Antiserum            | Antigen       | Cross-<br>agglutination (%) | CAAT, live<br>antigen ( %) | CAAT, dead<br>antigen ( %) |
|----------------------|---------------|-----------------------------|----------------------------|----------------------------|
| <b>Bafani</b>        | 782           | 6.25                        | Nil                        | Nil                        |
| <b>Benjamini</b>     | 782           | 3.13                        | Nil                        | Nil                        |
| <b>Malaya H6</b>     | 782           | < 3.13                      | Nil                        | Nil                        |
| <b>Galtoni</b>       | 782           | 6.25                        | Nil                        | Nil                        |
| <b>Kuwait</b>        | 782           | 3.13                        | Nil                        | Nil                        |
| <b>Vleermus qoc</b>  | 782           | 6.25                        | Nil                        | Nil                        |
| <b>Qunjian</b>       | 782           | 3.13                        | Nil                        | Nil                        |
| <b>Hond Utrecht</b>  | 782           | 50                          | 25                         | 25                         |
| <b>Yonsis</b>        | 782           | 50                          | 25                         | 25                         |
| <b>Portlandvere</b>  | 782           | 50                          | 25                         | 50                         |
| <b>Sumneri</b>       | 782           | 50                          | 25                         | 25                         |
| <b>Kamituga</b>      | 782           | 12/62*                      | Nil                        | Nil                        |
| <b>782</b>           | Kamituga      | 12/62*                      | 100                        | 50                         |
| <b>Broomi patane</b> | 782           | 50                          | 0.2                        | 0.2                        |
| <b>782</b>           | Broomi patane | 50                          | 6.3                        | 6.3                        |
| <b>782</b>           | Broomi patane | 50                          | 12.5                       | 12.5                       |
| <b>Broomi patane</b> | 782           | 50                          | 3.1                        | 3.1                        |
| <b>782</b>           | Broomi patane | 50                          | 12.5                       | 12.5                       |
| <b>782</b>           | Broomi patane | 50                          | 12.5                       | 12.5                       |
| <b>Bindjei</b>       | 782           | 50                          | 0.8                        | < 0.4                      |
| <b>782</b>           | Bindjei       | 50                          | 6.3                        | 0.4                        |
| <b>782</b>           | Bindjei       | 50                          | 3.1                        | 6.3                        |
| <b>Bindjei</b>       | 782           | 50                          | 3.1                        | 1.6                        |
| <b>782</b>           | Bindjei       | 50                          | 1.6                        | 1.6                        |

\*Results were inconclusive, as repeat measures yielded both values.
