# Supplementary material for: Complete Genome Sequencing of Leptospira interrogans Isolates from Malaysia Reveals Massive Genome Rearrangement but High Conservation of Virulence-Associated Genes
Source: MDPI journal article supplement (doi:10.3390/pathogens10091198), 2021-09-15
Supplement: s1 [file s1]

**Table S1. Summary of sociodemographic and clinical data of six patients with *L. interrogans* infection contracted in Malaysia**

| Case                    | Langkawi^                                        | 782                                         | 898                             | 1489                                         | 1548                                    | 1530                                                     |
|-------------------------|--------------------------------------------------|---------------------------------------------|---------------------------------|----------------------------------------------|-----------------------------------------|----------------------------------------------------------|
| <u>Patient details</u>  |                                                  |                                             |                                 |                                              |                                         |                                                          |
| Age                     | 50                                               | 15                                          | 21                              | 24                                           | 27                                      | 24                                                       |
| Gender                  | Male                                             | Male                                        | Male                            | Male                                         | Male                                    | Male                                                     |
| Admission (days)        | 11                                               | 6                                           | 6                               | 4                                            | 7                                       | 6                                                        |
| ICU Admission (days)    | 2.5                                              | 4                                           | 0                               | 1                                            | 3                                       | 0                                                        |
| <u>Clinical details</u> |                                                  |                                             |                                 |                                              |                                         |                                                          |
| History of exposure     | Wading mangrove forest 1 week prior to admission | Swimming in river 1 week prior to admission | Rodent infestation at workplace | Swimming in river 2 weeks prior to admission | Patient denied any significant exposure | Jungle trekking and swimming in river prior to admission |
| Signs symptoms          | Fever                                            | High grade fever                            | Fever                           | High grade fever                             | Fever                                   | Fever                                                    |
|                         | NA                                               | NA                                          | Headache                        | NA                                           | NA                                      | NA                                                       |
|                         | NA                                               | chills, rigors                              | chills, rigors                  | chills                                       | chills,                                 | chills, rigors,                                          |
|                         | myalgia                                          | myalgia, arthralgia                         | NA                              | myalgia, arthralgia                          | myalgia                                 | NA                                                       |
|                         | nausea, vomiting, diarrhea                       | epigastric pain                             | vomiting                        | vomiting                                     | vomiting epigastric pain, diarrhea      | vomiting                                                 |
|                         | jaundice                                         | jaundice                                    | jaundice                        | NA                                           | NA                                      | NA                                                       |
|                         | NA                                               | conjunctival suffusion+                     | tea-coloured urine              | NA                                           | NA                                      | NA                                                       |

|                                      |                               |                      |                      |                      |                      |                      |
|--------------------------------------|-------------------------------|----------------------|----------------------|----------------------|----------------------|----------------------|
|                                      | hemoptysis                    | dyspnoea             | NA                   | NA                   | dyspnoea             | NA                   |
| Complications                        | Septic shock                  | Septic shock         | NA                   | Septic shock         | Septic shock         | NA                   |
|                                      | Weil's syndrome,              | Weil's syndrome      | NA                   | NA                   | NA                   | NA                   |
|                                      | pulmonary hemorrhage          | NA                   | NA                   | NA                   | NA                   | NA                   |
|                                      | NA                            | NA                   | Acute kidney injury  | NA                   | Acute kidney injury  | NA                   |
| Isolation date & place               | Netherlands <sup>s</sup> 2004 | Klang, Malaysia 2014 | Klang, Malaysia 2014 | Klang, Malaysia 2014 | Klang, Malaysia 2015 | Klang, Malaysia 2014 |
| <i>Lab results</i>                   |                               |                      |                      |                      |                      |                      |
| WBC count (>11 x 10 <sup>9</sup> /L) | 16.2                          | 14.9                 | 11.7                 | 11.0                 | 6.5                  | 15                   |
| Hemoglobin (<12 g/dL)                | ND                            | 11.6                 | 14.6                 | 13                   | 11.2                 | 14                   |
| Platelets (<100 x10 <sup>9</sup> /L) | 115                           | 31                   | 127                  | 181                  | 105                  | 184                  |
| PT (11 - 13.5 s)                     | 13.7                          | 15.4                 | ND                   | ND                   | ND                   | ND                   |
| INR (0.8 - 1.1)                      | ND                            | 1.28                 | ND                   | ND                   | ND                   | ND                   |
| CRP (0.8 - 3.0 mg/L)                 | ND                            | 2161                 | 165                  | ND                   | ND                   | ND                   |
| Serum creatinine (>120 µmol/L)       | 315                           | 124                  | 171                  | ND                   | ND                   | ND                   |
| Blood urea (>10 mmol/L)*             | ND                            | 9.1                  | 10.1                 | ND                   | ND                   | ND                   |
| ALT (>45 U/L)                        | 370                           | 62                   | 22                   | ND                   | ND                   | ND                   |

|                                          |         |          |          |          |          |          |
|------------------------------------------|---------|----------|----------|----------|----------|----------|
| AST (>40 U/L)                            | 1110    | 59       | 80       | ND       | ND       | ND       |
| CK (>190 U/L)                            | 5.421   | 280      | 262      | ND       | ND       | ND       |
| Serum bilirubin (17<br>µmol/L)           | ND      | 29       | ND       | ND       | ND       | ND       |
| Bilirubin (mg/dL)                        | 258     | ND       | 65.3     | ND       | ND       | ND       |
| Direct bilirubin<br>(mg/dL)              | ND      | ND       | ND       | ND       | ND       | ND       |
| Sodium (135 -145<br>mEq/L)               | ND      | 136      | 138      | ND       | ND       | ND       |
| Potassium (3.6 - 5.2<br>mmol/L)          | ND      | 3.6      | 3.9      | ND       | ND       | ND       |
| Lepto IgM                                | 1 : 160 | Negative | Negative | Negative | Negative | Negative |
| Dengue IgM                               | NA      | Negative | Negative | Negative | Negative | Negative |
| Anti-Mycoplasma<br>antibody              | NA      | NA       | NA       | NA       | 1: 40    | NA       |
| <u>Vital signs</u>                       |         |          |          |          |          |          |
| SBP (mmHg)                               | 120     | 88       | 102      | 88       | 130      | 101      |
| DBP (mmHg)                               | 68      | 55       | 62       | 49       | 85       | 60       |
| Pulse rate (min)                         | 124     | 140      | 100      | 79       | 90       | 96       |
| Respiratory rate<br>(per min)            | ND      | 35       | 35       | 35       | 35       | 35       |
| Glasgow Coma<br>Scale                    | ND      | 15/15    | 15/15    | 15/15    | 15/15    | 15/15    |
| Oxygen saturation<br>(SpO <sub>2</sub> ) | 96%     | 98%      | 98%      | 99%      | 93%      | NA       |
| Temperature<br>(°C)                      | 39      | 39       | 38.5     | 38       | 39       | NA       |

| <u>Treatment</u> |             |                  |             |                  |              |             |
|------------------|-------------|------------------|-------------|------------------|--------------|-------------|
| 1st antibiotic   | Amoxicillin | Doxycycline      | Doxycycline | Doxycycline      | Augmentin    | Doxycycline |
| 2nd antibiotic   | Doxycycline | Ceftriaxone      | Ceftriaxone | Ceftriaxone      | Azithromycin | Ceftriaxone |
| Dopamine         | Yes         | No               | NA          | No               | NA           | NA          |
| Inotropes (max)  | ND          | * Noradr<br>8 mg | NA          | * Noradr<br>4 mg | NA           | NA          |

All values were determined upon admission to hospital unless stated otherwise. ND, no data; NR, not relevant, ^Wagenaar et al, 2005; ALT, alanine transferase; AST, aspartate transferase; CK, creatinine kinase; CRP, C-reactive protein; PT, prothrombin time; aPTT, activated partial thromboplastin time; INR, international normalize ratio; WBC, white blood count. \*Noradrenaline. §Isolated in the Netherlands, but the infection was contracted in Malaysia.
