# Supplementary material for: Complete Genome Sequencing of Leptospira interrogans Isolates from Malaysia Reveals Massive Genome Rearrangement but High Conservation of Virulence-Associated Genes
Source: MDPI journal article supplement (doi:10.3390/pathogens10091198), 2021-09-15
Supplement: s1 [file s1]

**Table S12. Protein homology of lipid A proteins in six *L. interrogans* strains with reference to strain Fiocruz L1-130.** The protein homologies of all six *L. interrogans* strains were almost the same except in gene *kdsB1*, protein LA1625.

| Gene locus/<br>Protein name | GenBank<br>Accession | Protein name                                                            | Langkawi | 782  | 898  | 1489 | 1548 | 1530 <sup>d</sup> |
|-----------------------------|----------------------|-------------------------------------------------------------------------|----------|------|------|------|------|-------------------|
| <i>lpxA</i> / LA_3949       | NP_714129.1          | UDP-N-acetylglucosamine<br>acyltransferase                              | 100%     | 100% | 100% | 100% | 100% | 100%              |
| <i>lpxC</i> / LA_2306       | NP_712487.2          | UDP-3-O-[3-<br>hydroxymyristoyl] N-<br>acetylglucosamine<br>deacetylase | 99%      | 99%  | 99%  | 100% | 100% | 100%              |
| <i>lpxD1</i> / LA_0512      | NP_710694.1          | UDP-3-O-[3-<br>hydroxymyristoyl]<br>glucosamine N-<br>acyltransferase   | 100%     | 100% | 100% | 100% | 100% | 100%              |
| <i>lpxD2</i> / LA_4326      | NP_714506.1          | UDP-3-O-[3-<br>hydroxymyristoyl]                                        | 99%      | 99%  | 99%  | 99%  | 99%  | 99%               |
| <i>lpxB1</i> / LA_0786      | NP_710967.1          | arabinose kinase                                                        | 100%     | 99%  | 99%  | 100% | 99%  | 99%               |
| <i>lpxB2</i> / LA_1096      | NP_711277.2          | lipid-A-disaccharide<br>synthase                                        | 100%     | 99%  | 100% | 100% | 100% | 100%              |
| <i>lpxK</i> / LA_3095       | NP_713875.1          | tetraacyldisaccharide 4'-<br>kinase                                     | 100%     | 99%  | 99%  | 99%  | 99%  | 100%              |
| <i>kdtA</i> / LA_1477       | NP_711657.1          | 3-deoxy-D-manno-<br>octulosonic-acid<br>transferase                     | 100%     | 99%  | 100% | 100% | 99%  | 100%              |
| <i>kdsB1</i> / LA_1625      | NP_711806.1          | 3-deoxy-manno-<br>octulosonate<br>cytidyltransferase                    | 99%      | 53%  | 99%  | 53%  | 53%  | 99%               |
| <i>kdsB2</i> / LA_3573      | NP_713753.2          | 3-deoxy-manno-<br>octulosonate<br>cytidyltransferase                    | 100%     | 100% | 100% | 100% | 100% | 100%              |

|                       |             |                                              |      |      |      |      |      |      |
|-----------------------|-------------|----------------------------------------------|------|------|------|------|------|------|
| <i>lnt</i> / LA_4078  | NP_714258.2 | apolipoprotein N-acyltransferase             | 100% | 100% | 100% | 100% | 100% | 100% |
| <i>kdsA</i> / LA_2408 | NP_712589.2 | 2-dehydro-3-deoxyphosphooctonate aldolase    | 100% | 100% | 100% | 100% | 100% | 100% |
| <i>htrB</i> / LA_4039 | NP_714219.2 | lipid A biosynthesis lauroyl acyltransferase | 100% | 100% | 100% | 100% | 99%  | 100% |
