# Supplementary material for: Complete Genome Sequencing of Leptospira interrogans Isolates from Malaysia Reveals Massive Genome Rearrangement but High Conservation of Virulence-Associated Genes
Source: MDPI journal article supplement (doi:10.3390/pathogens10091198), 2021-09-15
Supplement: s1 [file s1]

**Table S6. Assignment of sequence types to the six Malaysian *L. interrogans* strains using MLST (Scheme 1).**

Sequence types were assigned using the *Leptospira* MLST website (<http://leptospira.mlst.net/>).

| Isolate         | <i>glmU</i> | <i>pntA</i> | <i>sucA</i> | <i>tpiA</i> | <i>pfkB</i> | <i>mreA</i> | <i>caiB</i> | ST   | Serovar/strain                                                       |
|-----------------|-------------|-------------|-------------|-------------|-------------|-------------|-------------|------|----------------------------------------------------------------------|
| <b>Langkawi</b> | 1           | 71^         | 1           | 13          | 34          | 3           | 6           | 236* | NR                                                                   |
| <b>782</b>      | 1           | 13          | 2           | 2           | 6           | 10          | 13          | 240* | NR                                                                   |
| <b>898</b>      | 1           | 1           | 2           | 2           | 10          | 4           | 8           | 17   | <i>Copenhageni</i> Fiocruz L1-130/<br><i>Icterohaemorrhagiae</i> RGA |
| <b>1489</b>     | 1           | 1           | 1           | 4           | 18          | 5           | 6           | 241* | NR                                                                   |
| <b>1548</b>     | 6           | 8           | 2           | 2           | 9           | 7           | 5           | 50   | <i>Bataviae</i> /<br>Losbanos LT101-69                               |
| <b>1530</b>     | 1           | 1           | 1           | 1           | 76^         | 2           | 58^         | 237* | NR                                                                   |

^ New allele

\* Novel ST

NR, not relevant
