# Supplementary material for: Complete Genome Sequencing of Leptospira interrogans Isolates from Malaysia Reveals Massive Genome Rearrangement but High Conservation of Virulence-Associated Genes
Source: MDPI journal article supplement (doi:10.3390/pathogens10091198), 2021-09-15
Supplement: s1 [file s1]

Table S8. Identification and distribution of prophages in six *L. interrogans* strains.

| Strain   | Replicon | Region length | Completeness | Score | No. Total Proteins | Region position | Phage identification  | Detail          |
|----------|----------|---------------|--------------|-------|--------------------|-----------------|-----------------------|-----------------|
| Langkawi | Chr 2    | 8.6Kb         | incomplete   | 30    | 12                 | 237357-246004   | PHAGE_Salisa_1_       | terminase, tail |
|          | Chr 1    | 9.7Kb         | incomplete   | 60    | 11                 | 1047304-1057067 | PHAGE_Lister_B054_    | head, capsid    |
|          | Chr 1    | 10.5Kb        | incomplete   | 30    | 14                 | 1058927-1069497 | PHAGE_Deep_s_D6E_     | plate, tail     |
|          | Chr 1    | 9.4Kb         | incomplete   | 10    | 10                 | 1426160-1435647 | PHAGE_Bacill_SP_15_   | -               |
|          | Chr 1    | 11.4Kb        | incomplete   | 10    | 9                  | 2621637-2633036 | PHAGE_Sphing_PAU_     | -               |
|          | Chr 1    | 6.9Kb         | incomplete   | 30    | 7                  | 2709383-2716331 | PHAGE_Synech_S_CAM7_  | lysis           |
|          | Chr 1    | 6.2Kb         | incomplete   | 40    | 8                  | 3211720-3217923 | PHAGE_Pseudo_LMA2_    | tail, plate     |
| 782      | Chr 1    | 23Kb          | incomplete   | 30    | 13                 | 1155136-1178139 | PHAGE_Bacill_PfEFR_5_ | transposase     |
|          | Chr 1    | 7.2Kb         | incomplete   | 50    | 9                  | 1226026-1233243 | PHAGE_Pseudo_LMA2_    | plate, tail     |
|          | Chr 1    | 5Kb           | incomplete   | 50    | 8                  | 1628022-1633023 | PHAGE_Bacill_SP_15_   | transposase     |
|          | Chr 1    | 8.6Kb         | incomplete   | 30    | 11                 | 2641470-2650117 | PHAGE_Salisa_1_       | terminase,tail  |

|      |           |        |            |    |    |                 |                            |                |
|------|-----------|--------|------------|----|----|-----------------|----------------------------|----------------|
|      | Chr 1     | 11.3Kb | incomplete | 10 | 9  | 2772751-2784143 | PHAGE_Sphing_PAU           | -              |
|      | Chr 1     | 6.9Kb  | incomplete | 30 | 7  | 2867731-2874679 | PHAGE_Synech_S_CAM7_       | lysis          |
|      | Chr 1     | 9.4Kb  | incomplete | 10 | 10 | 3077867-3087353 | PHAGE_Synech_ACG_2014b_    | -              |
|      | Chr 1     | 9.9Kb  | incomplete | 30 | 13 | 3161600-3171587 | PHAGE_Psychr_pOW20_A       | tail           |
|      | Chr 1     | 8.6Kb  | incomplete | 30 | 12 | 3337482-3346129 | PHAGE_Salisa_1_            | terminase,tail |
|      | Plasmid 3 | 5.8Kb  | incomplete | 20 | 11 | 30880-36691     | PHAGE_Mannhe_vB_MhS_535AP2 | tail           |
| 1489 | Chr 1     | 28.3Kb | incomplete | 60 | 33 | 1730220-1758602 | PHAGE_Sphing_PAU_          | transposase    |
| 898  | Chr 1     | 9.4Kb  | incomplete | 10 | 10 | 1386689-1396161 | PHAGE_Bacill_SP_15_        | -              |
|      | Chr 1     | 11.4Kb | incomplete | 10 | 10 | 2563962-2575364 | PHAGE_Sphing_PAU_          | -              |
|      | Chr 1     | 11.6Kb | incomplete | 30 | 11 | 2647794-2659399 | PHAGE_Synech_S_CAM7_       | lysis          |
|      | Chr 1     | 6.2Kb  | incomplete | 40 | 8  | 3153143-3159346 | PHAGE_Pseudo_LMA2_         | tail, plate    |
| 1548 | Chr 1     | 8.4Kb  | incomplete | 30 | 9  | 3037136-3045545 | PHAGE_Acidia_virus_        | transposase    |
| 1530 | Chr 1     | 6.2Kb  | incomplete | 40 | 8  | 308140-314343   | PHAGE_Pseudo_LMA2_         | -              |
|      | Chr 1     | 7Kb    | incomplete | 30 | 7  | 2538121-2545213 | PHAGE_Lactob_Lj965_        | tail, plate    |

|  |       |        |            |    |    |                 |                      |             |
|--|-------|--------|------------|----|----|-----------------|----------------------|-------------|
|  | Chr 1 | 9.4Kb  | incomplete | 10 | 11 | 2813059-2822530 | PHAGE_Bacill_SP_15_  | transposase |
|  | Chr 1 | 11.3Kb | incomplete | 10 | 9  | 4024631-4036023 | PHAGE_Sphing_PAU_    | -           |
|  | Chr 1 | 11.6Kb | incomplete | 30 | 11 | 4109976-4121581 | PHAGE_Synech_S_CAM7_ | lysis       |

Chr, chromosome
