# Supplementary material for: Complete Genome Sequencing of Leptospira interrogans Isolates from Malaysia Reveals Massive Genome Rearrangement but High Conservation of Virulence-Associated Genes
Source: MDPI journal article supplement (doi:10.3390/pathogens10091198), 2021-09-15
Supplement: s1 [file s1]

**Table S11: Identification and distribution of insertion sequence in six *L. interrogans* strains.**

Insertion sequence (IS) were identified in the whole genome sequences by ISFinder.

| Strain          | Replicon          | ISLin1 | ISLin2 | IS500A | IS1500B | IS1501 | IS1502 | IS1533 |
|-----------------|-------------------|--------|--------|--------|---------|--------|--------|--------|
| <b>Langkawi</b> | Chr 1             | 25     | 8      | ND     | ND      | ND     | 1      | 4      |
|                 | Chr 2             | 7      | ND     | ND     | ND      | ND     | ND     | ND     |
|                 | Plasmid 1         | ND     | ND     | ND     | ND      | ND     | ND     | ND     |
|                 | Plasmid 2         | ND     | ND     | ND     | ND      | ND     | ND     | ND     |
| <b>782</b>      | Chr 1             | 6      | 1      | ND     | ND      | ND     | ND     | ND     |
|                 | Chr 2             | ND     | ND     | ND     | ND      | ND     | ND     | ND     |
|                 | Plasmid 1         | ND     | ND     | ND     | 1       | ND     | ND     | ND     |
|                 | Plasmid 2         | ND     | ND     | ND     | ND      | 1      | ND     | ND     |
|                 | Plasmid 3         | ND     | 1      | ND     | ND      | ND     | ND     | ND     |
| <b>898</b>      | Chr 1             | 0      | 1      | 8      | ND      | 7      | ND     | ND     |
|                 | Chr 2             | 4      | ND     | ND     | ND      | ND     | ND     | ND     |
| <b>1489</b>     | Chr 1             | 91     | ND     | ND     | 1       | 6      | 2      | 24     |
|                 | Chr 2             | 7      | ND     | ND     | ND      | ND     | ND     | ND     |
|                 | Plasmid 1         | ND     | ND     | ND     | ND      | 1      | ND     | ND     |
|                 | Plasmid 2         | ND     | 3      | ND     | ND      | ND     | ND     | ND     |
|                 | Plasmid 3         | ND     | ND     | ND     | 1       | 1      | ND     | ND     |
|                 | Plasmid 4         | ND     | ND     | 1      | ND      | 1      | ND     | ND     |
|                 | Plasmid 5         | ND     | ND     | ND     | ND      | ND     | ND     | ND     |
| <b>1548</b>     | Chr 1             | 65     | 9      | ND     | ND      | 7      | 2      | 2      |
|                 | Chr 2             | 5      | 1      | ND     | ND      | ND     | ND     | ND     |
|                 | Plasmid 1         | ND     | ND     | ND     | ND      | 1      | ND     | ND     |
|                 | Plasmid 2         | 0      | 4      | ND     | ND      | ND     | ND     | ND     |
| <b>1530</b>     | Chr 1 (unitig_0)  | 59     | 8      | ND     | 0       | 4      | 1      | 3      |
|                 | Chr 2 (unitig_57) | 7      | ND     | ND     | 1       | ND     | ND     | ND     |
|                 | Unitig_2          | 1      | ND     | ND     | ND      | 1      | ND     | ND     |

|  |           |    |    |    |    |    |    |    |
|--|-----------|----|----|----|----|----|----|----|
|  | Unitig_58 | ND | ND | ND | ND | 1  | ND | ND |
|  | Unitig_59 | ND | ND | 1  | ND | ND | ND | ND |
|  | Unitig_61 | ND | 1  | ND | ND | ND | ND | ND |

ND, not detected

Chr, chromosome
