# Supplementary material for: Complete Genome Sequencing of Leptospira interrogans Isolates from Malaysia Reveals Massive Genome Rearrangement but High Conservation of Virulence-Associated Genes
Source: MDPI journal article supplement (doi:10.3390/pathogens10091198), 2021-09-15
Supplement: s1 [file s1]

Table S9. Identification and distribution of CRISPR spacers in six *L. interrogans* strains

| Strain          | Repeat Region | Copy | CRSIPR                                               | Blastn (spacer)                                                               | Coverage (%) | Identification (%) | Plasmid match |
|-----------------|---------------|------|------------------------------------------------------|-------------------------------------------------------------------------------|--------------|--------------------|---------------|
| Langkawi        | DR consensus  | 1    | CGCCTAACGGCATCAAAGTT<br>ATATTCAG                     | <i>Leptospira interrogans</i> serovar Linhai str.56609" plasmid <i>lcp3</i>   | 81           | 100                | None          |
|                 | Spacer        | 2    | AAAATCGTTGTTGCGAAATG<br>CGGATCGTTGTTTCAGGTGCT<br>CAA | product = "putative bacteriophage tail fiber protein"                         |              |                    |               |
|                 | DR consensus  | 4    | CGCCTAACGGCATCAAAGTT<br>ATATTCAG                     | <i>Leptospira interrogans</i> strain FMASAW1 plasmid <i>pLiSL2</i>            | 81           | 100                | None          |
|                 | Spacer        | 1    | CTTGAATCGAAGTGTTAGAA<br>ATTGAAAATTTTTTCGGTGCT<br>CAA | product="hypothetical protein"                                                |              |                    |               |
|                 | DR consensus  | 6    | CGCCTAACGGCATCAAAGTT<br>ATATTCAG                     | <i>Leptospira interrogans</i> serovar Linhai str.56609" plasmid <i>lcp3</i> , | 80           | 100                | None          |
|                 | Spacer        | 5    | TTCGTCAAAGACGAGAGAG<br>TATCTCAAGAGAAGAGTGCT<br>CAA   | product="Helix-turn-helix domain containing protein"                          |              |                    |               |
| Total CRISPR:16 |               |      |                                                      |                                                                               |              |                    |               |
| 782             | DR consensus  | 12   | CTGAATATAACTTTGATGCC<br>GTTAGGCGTTGAGCAC             | <i>Leptospira interrogans</i> serovar Linhai                                  | 100          | 97.14              | None          |

|              |    |                                          |                                                                                                 |     |     |                                  |
|--------------|----|------------------------------------------|-------------------------------------------------------------------------------------------------|-----|-----|----------------------------------|
| Spacer       | 1  | ATCATGCGAATCCGGTGGG<br>AACGTTGCTGGTTTAT  | str.56609"plasmid<br><i>lcp1</i> ,<br>product="putative<br>bacteriophage tail<br>fiber protein" |     |     |                                  |
| DR consensus | 12 | CTGAATATAACTTTGATG<br>CCGTTAGGCGTTGAGCAC | <i>Leptospira interrogans</i><br>serovar Linhai<br>str.56609"<br>plasmid <i>lcp3</i> ,          | 100 | 100 | None                             |
| Spacer       | 2  | ATCCAAATTGTCCTTTCCCC<br>ATTGCCTGTAGGGAT  | product="hypothetical<br>protein"                                                               |     |     |                                  |
| DR consensus | 12 | CTGAATATAACTTTGATGCC<br>GTTAGGCGTTGAGCAC | <i>Leptospira interrogans</i><br>serovar Linhai<br>str.56609"plasmid <i>lcp3</i> ,              | 100 | 100 | Langkawi:<br>Unitig 15;<br>1530: |
| Spacer       | 3  | CAATTGTGATCGGAATCGGT<br>TTCCAAAATTTAAG   | product="putative<br>phage replication<br>related protein"                                      |     |     | Unitig 62;<br>782:<br>Unitig 6.  |
| DR consensus | 12 | CTGAATATAACTTTGATGCC<br>GTTAGGCGTTGAGCAC | <i>Leptospira interrogans</i><br>strain FMAS_AW1<br>plasmid <i>pLiSL2</i>                       | 100 | 100 | None                             |
| Spacer       | 5  | GATGAAACAAAAGTCCCTC<br>GAATTCAAGTGAGGCT  | product="hypothetical<br>protein"                                                               |     |     |                                  |
| DR consensus | 12 | CTGAATATAACTTTGATGCC<br>GTTAGGCGTTGAGCAC | <i>Leptospira interrogans</i><br>strain FMAS_AW1<br>plasmid <i>pLiSL2</i>                       | 100 | 100 | None                             |
| Spacer       | 7  | AGGTCCACCCCTTCCTGAGT<br>AGACACAGGCAACGGA | product="hypothetical<br>protein"                                                               |     |     |                                  |
| DR consensus | 12 | CTGAATATAACTTTGATGCC<br>GTTAGGCGTTGAGCAC | <i>Leptospira interrogans</i><br>serovar Linhai<br>str.56609"plasmid <i>lcp1</i> ,              | 100 | 100 | None                             |

|                            |              |    |                                            |                                                                          |     |       |      |
|----------------------------|--------------|----|--------------------------------------------|--------------------------------------------------------------------------|-----|-------|------|
| <b>Total<br/>CRISPR:16</b> | Spacer       | 8  | ACAAAAGCAGCATATCTAG<br>ACTTATCCAAAATAGAT   | product="hypothetical<br>protein"                                        |     |       |      |
| <b>1489</b>                | DR consensus | 4  | GTGCTCAACGCCTAACGGCA<br>TCAAAGTTATATTCAG   | <i>Leptospira interrogans</i><br>serovar Hardjo-<br>prajitno str. Hardjo | 100 | 100   | None |
|                            | Spacer       | 3  | TCTTCCGAAACGGAAACAC<br>GCCAAGGGTCTATAATTT  | product="plasmid<br>replication initiation<br>factor"                    |     |       |      |
|                            | DR consensus | 4  | GTGCTCAACGCCTAACGGCA<br>TCAAAGTTATATTCAG   | <i>Leptospira interrogans</i><br>serovar Linhai                          | 100 | 100   | None |
|                            | Spacer       | 8  | AGGGGCGCTTTTCCGGGTCC<br>TCATTGTTCTATTTT    | str.56609"plasmid <i>lcp1</i> ,<br>product="hypothetical<br>protein"     |     |       |      |
|                            | DR consensus | 4  | GTGCTCAACGCCTAACGGCA<br>TCAAAGTTATATTCAG   | <i>Leptospira interrogans</i><br>serovar Linhai                          | 100 | 94.44 | None |
|                            | Spacer       | 9  | TTCCAGCATTGGCGGGGAAC<br>CCTCAAGCATTGCAAT   | str.56609"plasmid <i>lcp1</i> ,<br>product="hypothetical<br>protein"     |     |       |      |
| <b>Total<br/>CRISPR:15</b> | DR consensus | 4  | GTGCTCAACGCCTAACGGCA<br>TCAAAGTTATATTCAG   | <i>Leptospira interrogans</i><br>serovar Linhai                          | 100 | 100   | None |
|                            | Spacer       | 12 | GCGCTGTCGTTTGCGGGCAA<br>GCCGTAAGACCGCAT    | str.56609"plasmid <i>lcp1</i> ,<br>product="hypothetical<br>protein"     |     |       |      |
| <b>1548</b>                | DR consensus | 8  | CTGAATATAACTTTGATGCC<br>GGTAGGCGTTGAGCAC   | <i>Leptospira interrogans</i><br>serovar Linhai                          | 100 | 97.37 | None |
| <b>Total<br/>CRISPR:13</b> | Spacer       | 1  | AGTTACTCAAAAATACTCAA<br>TTAGAGGAGTATTGGGGA | str.56609"plasmid <i>lcp3</i> ,<br>product="hypothetical<br>protein"     |     |       |      |
