# Supplementary material for: Complete Genome Sequencing of Leptospira interrogans Isolates from Malaysia Reveals Massive Genome Rearrangement but High Conservation of Virulence-Associated Genes
Source: MDPI journal article supplement (doi:10.3390/pathogens10091198), 2021-09-15
Supplement: s1 [file s1]

**Table S3. Serovar typing was performed by microagglutination tests of isolates with sets of monoclonal antibodies (mAb) corresponding to specific serogroups. Five strains could be assigned to serovars but results for strain 782 were inconclusive.**

| Strain             | 782                      | 898                                       | 1489                            | 1548                           | 1530                          |
|--------------------|--------------------------|-------------------------------------------|---------------------------------|--------------------------------|-------------------------------|
| Serogroup          | Canicola                 | Icterohaemorrhagiae                       | Bataviae                        | Bataviae                       | Icterohaemorrhagiae           |
| mAb panel          | F152C1; 80               | F20C3-1; 10240                            | F129C2-3; 20480                 | F129C2-3; 20480                | F20C3-1; 10                   |
|                    | F152C2; 10               | F20C4-3; 20480                            | F129C3-3; 5120                  | F129C3-3; 10240                | F20C4-3; 10                   |
|                    | F152C5; 10               | F52C1-4; 80                               | F129C4-1; 640                   | F129C4-1; 320                  | F52C1-4; 160                  |
|                    | F152C7; 5120             | F52C2-4; 10                               | F129C6-1; 1280                  | F129C6-1; 20480                | F52C2-4; 10                   |
|                    | F152C8; 640              | F70C4-5; 2560                             | F129C7-1; 320                   | F129C7-1; 20480                | F70C4-5; 1280                 |
|                    | F152C10; 20480           | F70C13-5; 1280                            | F129C9-5; 10                    | F129C9-5; 5120                 | F70C13-5; 2560                |
|                    | F152C11; 2560            | F70C20-4; 2560                            | F129C15-3; 10                   | F129C15-3; 5120                | F70C20-4; 640                 |
|                    | F152C13; 10              | F70C24-20; 2560                           | F129C18-1; 10                   | F129C18-1; 20480               | F70C24-20; 10                 |
|                    | F152C14; 2560            | F70C26-3; 1280                            | F129C19-3; 20480                | F129C19-3; 20480               | F70C26-3; 1280                |
|                    | F152C17; 10              | F82C1-3; 10                               | F129C20-5; 20480                | F129C20-5; 20480               | F82C1-3; 1280                 |
|                    | F152C18; 10              | F82C2-3; 10                               | F129C24-3; 20480                | F129C24-3; 20480               | F82C2-3; 40                   |
|                    |                          | F82C7-3; 10                               | F129C25-1; 2560                 | F129C25-1; 20480               | F82C7-3; 10                   |
|                    |                          | F82C8-4; 10                               | F129C26-1; 10                   | F129C26-1; 1280                | F82C8-7; 5120                 |
|                    |                          | F89C3-3; 320                              |                                 |                                | F89C3-3; 5120                 |
|                    |                          | F89C12-6; 640                             |                                 |                                | F89C12-6; 5120                |
| Homologous serovar | To be determined by CAAT | serovar Copenhageni / Icterohaemorrhagiae | serovar Paidjan, strain Paidjan | serovar Bataviae, strain Swart | serovar Yeonchon, strain HM 3 |
