# Supplementary material for: Complete Genome Sequencing of Leptospira interrogans Isolates from Malaysia Reveals Massive Genome Rearrangement but High Conservation of Virulence-Associated Genes
Source: MDPI journal article supplement (doi:10.3390/pathogens10091198), 2021-09-15
Supplement: s1 [file s1]

**Table S14. Protein homologies in the alginate biosynthesis pathway, as well as regulatory and genotypic switching in six *L. interrogans* strains with reference to *P. aeruginosa* PA01.** Strong homologies (e-value >56) were detected in 12 proteins associated with structural biosynthesis (including copies of *algI*), 1 regulatory protein, and 1 protein associated with genotypic switching.

| Gene cluster                | NCBI       | Gene               | Gene product                   | Langkawi  | 782     | 898       | 1489      | 1548      | 1530      |
|-----------------------------|------------|--------------------|--------------------------------|-----------|---------|-----------|-----------|-----------|-----------|
| Structural/<br>biosynthetic | ARG85621.1 | <i>algD</i>        | GDP-mannose dehydrogenase      | 6e-63     | 5e-54   | 3e-63     | 5e-54     | 5e-54     | 5e-54     |
|                             | OGX66506.1 | <i>alg8</i>        | Subunit of alginate polymerase | ND        | ND      | ND        | ND        | ND        | ND        |
|                             | PTC38438.1 | <i>alg44</i>       | Subunit of alginate polymerase | 3e (50%)  | ND      | ND        | ND        | ND        | ND        |
|                             | AVV63678.1 | <i>algK</i>        | Subunit of protein scaffold    | ND        | ND      | ND        | ND        | ND        | ND        |
|                             | PTC38436.1 | <i>algE(alg76)</i> | Porin-like OM protein          | ND        | ND      | ND        | ND        | ND        | ND        |
|                             | ARG85616.1 | <i>algG</i>        | Mannuronan C-5 epimerase       | ND        | ND      | ND        | ND        | ND        | ND        |
|                             | AAA91126.1 | <i>algX(alg60)</i> | Subunit of protein scaffold    | 3.6 (51%) | 4 (51%) | 3.4 (51%) | 3.4 (51%) | 3.6 (51%) | 3.6 (51%) |
|                             | ARG85614.1 | <i>algL</i>        | Alginate lyase                 | ND        | ND      | ND        | ND        | ND        | ND        |
|                             | ARG85613.1 | <i>algI</i>        | Acetylase                      | 1e-90     | 1e-90   | 1e-90     | 1e-90     | 1e-90     | 1e-90     |
|                             | ARG85613.1 | <i>algI</i>        | Acetylase                      | 2e-83     | 9e-84   | 2e-83     | 2e-83     | 2e-83     | 2e-83     |
|                             | ARG85613.1 | <i>algI</i>        | Acetylase                      | 3e-83     | 2e-83   | 3e-83     | 4e-83     | 5e-83     | 3e-83     |
|                             | ARG85613.1 | <i>algI</i>        | Acetylase                      | 2e-80     | 2e-80   | 2e-80     | 2e-80     | 2e-80     | 2e-80     |
|                             | ARG85613.1 | <i>algI</i>        | Acetylase                      | 5e-80     | 4e-80   | 2e-80     | 4e-80     | 5e-80     | 4e-80     |
|                             | ARG85613.1 | <i>algI</i>        | Acetylase                      | 6e-76     | 4e-77   | 4e-77     | 1e-76     | 3e-76     | 4e-76     |
|                             | ARG85613.1 | <i>algI</i>        | Acetylase                      | 2e-73     | 1e-73   | 1e-73     | 1e-73     | 9e-74     | 1e-73     |

|            |            |                     |                                     |                |                |                |                |                |                |
|------------|------------|---------------------|-------------------------------------|----------------|----------------|----------------|----------------|----------------|----------------|
|            | ARG85613.1 | <i>algI</i>         | Acetylase                           | 4e-73          | 4e-73          | 4e-73          | 4e-73          | 3e-73          | 4e-73          |
|            | ARG85613.1 | <i>algI</i>         | Acetylase                           | 2e-68          | 2e-68          | 3e-64          | 3e-64          | 2e-68          | 3e-64          |
|            | ARG85613.1 | <i>algI</i>         | Acetylase                           | 7e-64          | 8e-64          | 2e-63          | 2e-63          | 9e-64          | 7e-64          |
|            | BAT64151.1 | <i>algJ</i>         | Acetylase                           | ND             | ND             | ND             | ND             | ND             | ND             |
|            | BAT64150.1 | <i>algF</i>         | Acetylase                           | ND             | ND             | ND             | ND             | ND             | ND             |
|            | BAR66409.1 | <i>algA</i>         | PMI-GMP                             | 2e-60<br>(53%) | 1e-61<br>(53%) | 3e-62<br>(53%) | 2e-61<br>(53%) | 3e-61<br>(53%) | 3e-61<br>(53%) |
|            | ARG90425.1 | <i>algC</i>         | PMM                                 | 5e-33<br>(46%) | 3e-33<br>(45%) | 3e-33<br>(45%) | 7e-33<br>(45%) | 3e-33<br>(46%) | 3e-33<br>(46%) |
| Regulatory | AAC44751.1 | <i>algZ(fimS)</i>   | RHH DNA-binding protein             | ND             | ND             | ND             | 2.0<br>(60%)   | 1.8<br>(60%)   | ND             |
|            | PTC33675.1 | <i>algR(algR1)</i>  | Response regulator protein of TCSTS | 8e-12<br>(59%) | 9e-12<br>(59%) | 6e-12<br>(59%) | 2e-12<br>(59%) | 1.07<br>(35%)  | 2e-12<br>(59%) |
|            | BAR70739.1 | <i>algQ (algR2)</i> | Cognate sensor kinase               | ND             | ND             | ND             | ND             | ND             | ND             |
|            | SIP55675.1 | <i>algP(algR3)</i>  | Histone-like protein                | ND             | ND             | ND             | ND             | ND             | ND             |
|            | PTC33420.1 | <i>algB</i>         | NtrC subclass of TCSTS              | 9e-90<br>(58%) | 1e-89<br>(58%) | 8e-90<br>(58%) | 1e-89<br>(58%) | 9e-90<br>(58%) | 9e-90<br>(58%) |
