# Supplementary material for: Complete Genome Sequencing of Leptospira interrogans Isolates from Malaysia Reveals Massive Genome Rearrangement but High Conservation of Virulence-Associated Genes
Source: MDPI journal article supplement (doi:10.3390/pathogens10091198), 2021-09-15
Supplement: s1 [file s1]

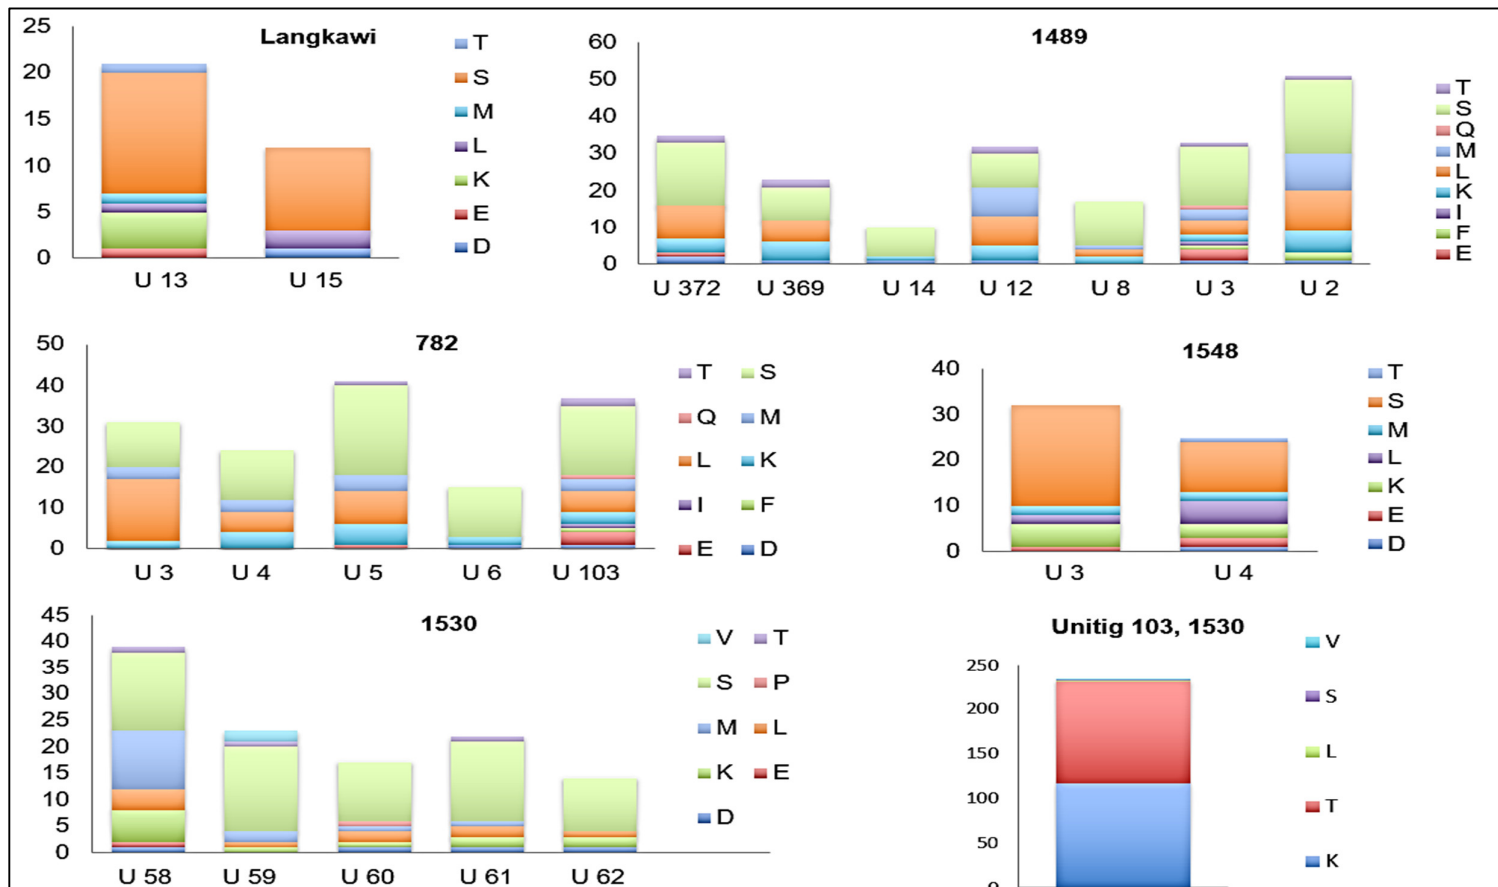

**Figure S1.** Functional annotation of proteins in the plasmids of the five plasmid-containing *L. interrogans* strains. D: cell cycle control, cell division, chromosome partitioning; E: amino acid transport and metabolism; F: nucleotide transport and metabolism; I: lipid transport and metabolism; K: transcription; L: replication, recombination and repair; M: cell wall, membrane, envelope biogenesis, P: inorganic ion transport and metabolism; Q: secondary metabolites biosynthesis, transport and catabolism; R: general function prediction only; S: function unknown; T: signal transduction mechanism; V: defense mechanism. U = unitig.
