# Supplementary material for: Complete Genome Sequencing of Leptospira interrogans Isolates from Malaysia Reveals Massive Genome Rearrangement but High Conservation of Virulence-Associated Genes
Source: MDPI journal article supplement (doi:10.3390/pathogens10091198), 2021-09-15
Supplement: s1 [file s1]

**Table S13. Protein homology of sialic acid biosynthesis genes in six *L. interrogans* strains with reference to strain Fiocruz L1-130.** Strains 1489 and 1548 showed differences in 12 out of 13 proteins associated with sialic acids biosynthesis genes.

| Protein name | Genebank accession | Function                                                                   | Langkawi | 782  | 898  | 1489 | 1548 | 1530 |
|--------------|--------------------|----------------------------------------------------------------------------|----------|------|------|------|------|------|
| LA_1605      | NP_711786.1        | CMP-N-acetylneuraminic acid synthetase (neuA1)                             | 100%     | 100% | 100% | 59%  | 59%  | 99%  |
| LA_1606      | NP_711787.1        | NAD dependent epimerase dehydratase family protein (rfbB3)                 | 100%     | 100% | 100% | 93%  | 93%  | 99%  |
| LA_1607      | NP_711788.1        | pyridoxal phosphate dependent aminotransferase                             | 100%     | 100% | 100% | 79%  | 79%  | 100% |
| LA_1608      | NP_711789.2        | sugar acyltransferase, sialic acid O- acetyltransferase NeuD family (neuD) | 100%     | 100% | 100% | 74%  | 74%  | 100% |
| LA_1609      | NP_711790.1        | pseudaminic acid synthetase (neuB)                                         | 100%     | 100% | 100% | 79%  | 79%  | 100% |
| LA_1610      | NP_711791.1        | UDP-N-acetylglucosamine 2-epimerase (neuC)                                 | 100%     | 100% | 100% | 78%  | 78%  | 100% |
| LA_1611      | NP_711792.1        | nucleotidyl transferase                                                    | 100%     | 100% | 100% | 67%  | 67%  | 100% |
| LA_1612      | NP_711793.1        | hypotheticalprotein                                                        | 100%     | 99%  | 100% | 58%  | 58%  | 99%  |
| LA_1613      | NP_711794.1        | N-acetylneuraminic (sialic) acid synthetase (sas/ neuB2)                   | 99%      | 99%  | 99%  | 39%  | 39%  | 99%  |
| LA_1614      | NP_711795.1        | pyridoxal phosphate dependent aminotransferase                             | 100%     | 100% | 100% | 52%  | 52%  | 100% |
| LA_1615      | NP_711796.1        | CMP-N-acetylneuraminic acid synthetase (neuA2)                             | 100%     | 100% | 100% | 53%  | 53%  | 100% |
| LA_1645      | NP_711826.1        | UDP-N- acetylglucosamine 2-epimerase                                       | 99%      | 99%  | 99%  | 42%  | 42%  | 99%  |
| LA_3823      | NP_714003.1        | UDP-N-acetylglucosamine diphosphorylase                                    | 100%     | 100% | 100% | 100% | 100% | 100% |
