# Supplementary material for: Complete Genome Sequencing of Leptospira interrogans Isolates from Malaysia Reveals Massive Genome Rearrangement but High Conservation of Virulence-Associated Genes
Source: MDPI journal article supplement (doi:10.3390/pathogens10091198), 2021-09-15
Supplement: s1 [file s1]

**Table S15: Protein Homologies of Bacterial Virulence Factors in Six Strains of *L. interrogans* Blasted in VFDB Software**

| Virulence function | Homologous bacterial virulence factor                                                 | Gene         | Langkawi | 782      | 898      | 1489     | 1548     | 1530     |
|--------------------|---------------------------------------------------------------------------------------|--------------|----------|----------|----------|----------|----------|----------|
| O                  | lipopolysaccharide biosynthesis protein [LPS] [ <i>Bordetella pertussis</i> Tohama I] | <i>bplC</i>  | 9.00E-72 | 9.00E-72 | 8.00E-60 | 4.00E-58 | 2.00E-71 | 1.00E-59 |
| O                  | lipopolysaccharide biosynthesis protein [LPS] [ <i>Bordetella pertussis</i> Tohama I] | <i>bplF</i>  | 1.00E-94 | 1.00E-94 | 1.00E-94 | 1.00E-94 | 9.00E-95 | 1.00E-94 |
| D                  | capsular polysaccharide synthesis enzyme Cap8D [ <i>Staphylococcus aureus</i> ]       | <i>cap8D</i> | e-112    | e-112    | e-112    | e-113    | e-112    | e-122    |
| D                  | capsular polysaccharide synthesis enzyme Cap8E [ <i>Staphylococcus aureus</i> ]       | <i>cap8E</i> | e-126    | e-126    | e-126    | 9.00E-69 | 8.00E-69 | e-126    |
| D                  | capsular polysaccharide synthesis enzyme Cap8F [ <i>Staphylococcus aureus</i> ]       | <i>cap8F</i> | 8.00E-92 | 4.00E-92 | 8.00E-92 | *N/S     | *N/S     | 6.00E-92 |
| D                  | capsular polysaccharide synthesis enzyme Cap8G [ <i>Staphylococcus aureus</i> ]       | <i>cap8G</i> | e-115    | e-115    | e-115    | *N/S     | *N/S     | e-115    |
| N                  | cytochrome c heme lyase subunit CcmF [ <i>Legionella pneumophila</i> ]                | <i>ccmF</i>  | 3.00E-58 | 3.00E-58 | 2.00E-55 | 3.00E-58 | 9.00E-64 | 1.00E-63 |
| O                  | Type III secretion system ATPase [TTSS] [ <i>Chlamydia trachomatis</i> ]              | <i>cdsN</i>  | 1.00E-96 | 1.00E-96 | 1.00E-96 | 1.00E-96 | 1.00E-96 | 1.00E-96 |
| O                  | chemotaxis protein CheA peritrichous flagella [ <i>Yersinia enterocolitica</i> ]      | <i>cheA</i>  | 3.00E-84 | 3.00E-83 | 8.00E-84 | 2.00E-83 | 8.00E-84 | 2.00E-78 |
| O                  | chemotaxis histidine kinase [ <i>Campylobacter jejuni</i> subsp. <i>jejuni</i> ]      | <i>cheA</i>  | 5.00E-93 | 6.00E-94 | 6.00E-94 | 6.00E-94 | 5.00E-93 | 5.00E-93 |
| O                  | chemotaxis-specific methylesterase CheB [ <i>Yersinia enterocolitica</i> ]            | <i>cheB</i>  | 1.00E-88 | 1.00E-88 | 1.00E-88 | 1.00E-88 | 1.00E-88 | 3.00E-93 |
| O                  | chemotaxis-specific methylesterase [ <i>Burkholderia pseudomallei</i> ]               | <i>cheB</i>  | 2.00E-81 | 3.00E-69 | 3.00E-69 | 3.00E-69 | 3.00E-69 | 3.00E-69 |
| D                  | endopeptidase Clp ATP-binding chain C [ <i>Listeria monocytogenes</i> EGD-e]          | <i>clpC</i>  | 0.0      | 0.0      | 0.0      | 0.0      | 0.0      | 0.0      |
| D                  | endopeptidase Clp ATP-binding chain C [ <i>Listeria monocytogenes</i> EGD-e]          | <i>clpC</i>  | e-143    | 0.0      | e-142    | e-142    | e-143    | e-143    |
| D                  | endopeptidase Clp ATP-binding chain C [ <i>Listeria monocytogenes</i> EGD-e]          | <i>clpC</i>  | 0.0      | 0.0      | 0.0      | 0.0      | 0.0      | 0.0      |
| D                  | ATP-dependent Clp protease proteolytic subunit [ <i>Listeria monocytogenes</i> ]      | <i>clpP</i>  | 4.00E-57 | 4.00E-57 | 4.00E-57 | 4.00E-57 | 4.00E-57 | 4.00E-57 |
| N                  | collagenase [kappa-toxin] [ <i>Clostridium perfringens</i> str. 13]                   | <i>colA</i>  | 2.00E-70 | 2.00E-70 | 2.00E-70 | 2.00E-70 | 7.00E-71 | 2.00E-70 |

|   |                                                                                |           |           |          |          |          |          |          |
|---|--------------------------------------------------------------------------------|-----------|-----------|----------|----------|----------|----------|----------|
| N | glucose-1-phosphate cytidylyltransferase [O-antigen][Yersinia enterocolitica ] | ddhA      | 7.00E-80  | 7.00E-80 | 7.00E-80 | 1.00E-67 | 1.00E-67 | 7.00E-80 |
| N | CDP-glucose 4,6-dehydratase [O-antigen] [Yersinia enterocolitica ]             | ddhB      | 8.00E-92  | 8.00E-92 | 8.00E-92 | 4.00E-96 | 7.00E-96 | 8.00E-92 |
| N | GDP-fucose synthetase [O-antigen] [Yersinia enterocolitica ]                   | fcl       | e-102     | e-102    | e-102    | 7.00E-97 | 7.00E-97 | e-102    |
| N | ferrous iron transporter B [FeoAB] [Legionella pneumophila ]                   | feoB      | 2.00E-78  | 3.00E-78 | 2.00E-78 | 3.00E-78 | 4.00E-78 | 3.00E-78 |
| O | flagellar synthesis regulator FleN [polar flagella][Legionella pneumophila ]   | fleN      | 3.00E-54  | 3.00E-54 | 2.00E-54 | 3.00E-54 | 3.00E-54 | 3.00E-54 |
| O | transcriptional regulator FleQ [polar flagella] [Legionella pneumophila]       | fleQ      | 2.00E-68  | 2.00E-68 | 2.00E-68 | 2.00E-68 | 2.00E-68 | 2.00E-68 |
| O | sigma 54-dependent response regulator [Legionella pneumophila ]                | fleR/flrC | 5.00E-83  | 3.00E-83 | 5.00E-83 | 5.00E-83 | 5.00E-83 | 5.00E-43 |
| O | flagellar basal-body rod protein [Helicobacter pylori 26695]                   | flgG      | 1.00E-74  | 1.00E-74 | 1.00E-74 | 1.00E-74 | 1.00E-74 | 1.00E-74 |
| O | flagellar P-ring protein precursor [Pseudomonas aeruginosa PAO1]               | flgI      | 6.00E-55  | 8.00E-55 | 6.00E-55 | 6.00E-55 | 6.00E-55 | 6.00E-55 |
| O | flagellar biosynthesis protein FlhA [Pseudomonas aeruginosa PAO1]              | flhA      | e-110     | e-110    | e-110    | e-110    | e-110    | e-110    |
| O | flagellar motor switch protein G [Helicobacter pylori ]                        | fliG      | 3.00E-60  | 3.00E-60 | 3.00E-60 | 3.00E-60 | 3.00E-60 | 3.00E-60 |
| O | flagellar motor switch protein FlhM [Helicobacter pylori ]                     | fliM      | 3.00E-60  | 3.00E-60 | 3.00E-60 | 3.00E-60 | 3.00E-60 | 3.00E-60 |
| O | UDP-glucose 4-epimerase [LOS] [Haemophilus influenzae ]                        | galE      | 4.00E-58  | 1.00E-57 | 1.00E-57 | 1.00E-57 | 1.00E-57 | 1.00E-57 |
| O | GDP-mannose 4,6-dehydratase [LPS] [Brucella melitensis]                        | gmd       | e-122     | e-122    | e-122    | e-122    | e-122    | e-122    |
| O | general secretion pathway protein D [T2SS] [Shigella dysenteriae ]             | gspD      | 2.00E-54  | 2.00E-54 | 2.00E-54 | 2.00E-54 | 2.00E-54 | 2.00E-54 |
| O | general secretion pathway protein E [T2SS] [Shigella dysenteriae]              | gspE      | e-120     | e-120    | e-120    | e-120    | e-120    | e-120    |
| O | beta-hemolysin [-hemolysin] [Staphylococcus aureus subsp. aureus]              | hlyB      | 2.00E-62  | 2.00E-57 | 2.00E-62 | 2.00E-62 | 2.00E-57 | 2.00E-57 |
| O | beta-hemolysin [-hemolysin] [Staphylococcus aureus subsp. aureus ]             | hlyB      | 3.00E-55  | 3.00E-55 | 3.00E-55 | 6.00E-52 | 3.00E-55 | 3.00E-55 |
| O | hemolysin transport protein [Hemolysin] [Escherichia coli O157:H7 ]            | hlyB      | 2.00E-56  | 2.00E-56 | 8.00E-56 | 2.00E-56 | 2.00E-56 | 2.00E-56 |
| O | 60K heat shock protein HtpB [Hsp60] [Legionella pneumophila ]                  | htpB      | 1.00E-169 | e-169    | e-169    | e-169    | e-169    | e-169    |
| O | catalase [KatA] [Neisseria meningitidis MC58]                                  | katA      | e-157     | e-157    | e-157    | e-157    | e-157    | e-157    |
| O | 2-dehydro-3-deoxyphosphooctonate aldolase [LPS] [Brucella melitensis ]         | kdsA      | 1.00E-71  | 1.00E-71 | 1.00E-71 | 1.00E-71 | 1.00E-71 | 1.00E-71 |
| O | D-arabinose 5-phosphate isomerase [Capsule] [Campylobacter jejuni ]            | kpsF      | 5.00E-61  | 5.00E-61 | 5.00E-61 | 2.00E-61 | 1.00E-60 | 2.00E-61 |
| O | UDP-N-acetylglucosamine acyltransferase [LOS] [Haemophilus influenzae ]        | lpxA      | 2.00E-53  | 2.00E-53 | 2.00E-53 | 2.00E-53 | 2.00E-53 | 2.00E-53 |
| O | lipid-A-disaccharide synthase [LOS] [Haemophilus influenzae Rd KW20]           | lpxB      | 1.00E-53  | 1.00E-53 | 2.00E-53 | 2.00E-53 | 1.00E-53 | 2.00E-53 |

|   |                                                                                               |      |          |          |          |           |           |          |
|---|-----------------------------------------------------------------------------------------------|------|----------|----------|----------|-----------|-----------|----------|
| O | UDP-3-O-(R-3-hydroxymyristoyl)-N-acetylglucosamine deacetylase [LOS] [Haemophilus influenzae] | lpxC | 9.00E-53 | 9.00E-53 | 9.00E-53 | 9.00E-53  | 9.00E-53  | 9.00E-53 |
| N | Mg2+ transport protein [MgtBC] [Salmonella enterica ]                                         | mgtB | e-133    | e-147    | e-147    | e-147     | e-146     | e-146    |
| O | lipid transporter ATP-binding/permease [LOS] [Haemophilus influenzae Rd ]                     | msbA | 3.00E-88 | 2.00E-88 | 8.00E-88 | 3.00E-88  | 3.00E-88  | 3.00E-88 |
| O | lipid transporter ATP-binding/permease [LOS] [Haemophilus influenzae Rd ]                     | msbA | 5.00E-84 | 4.00E-84 | 4.00E-84 | 4.00E-84  | 5.00E-84  | 4.00E-84 |
| D | multiple transferable resistance system protein MtrD [Neisseria meningitidis MC58]            | mtrD | 2.00E-56 | 5.00E-54 | 2.00E-54 | 2.00E-56  | 2.00E-56  | 2.00E-69 |
| D | multiple transferable resistance system protein MtrD [Neisseria meningitidis MC58]            | mtrD | 5.00E-56 | 2.00E-56 | e-56     | 5.00E-54  | 5.00E-54  | 1.00E-91 |
| D | multiple transferable resistance system protein MtrD [Neisseria meningitidis MC58]            | mtrD | 2.00E-69 | 1.00E-69 | 5.00E-92 | 2.00E-69  | 2.00E-69  | 5.00E-54 |
| D | multiple transferable resistance system protein MtrD [Neisseria meningitidis MC58]            | mtrD | 9.00E-92 | 7.00E-92 | 5.00E-92 | 1.00E-91  | 1.00E-91  | 2.00E-56 |
| D | N-acetyl neuramic acid synthetase NeuB [Streptococcus agalactiae]                             | neuB | 5.00E-93 | 5.00E-93 | 5.00E-93 | 7.00E-53  | 7.00E-53  | 5.00E-93 |
| D | N-acetyl neuramic acid synthetase NeuB [Streptococcus agalactiae 2603V/R]                     | neuB | N        | N        | N        | *2E-91    | *2E-91    | N        |
| D | UDP-N-acetylglucosamine-2-epimerase[Streptococcus agalactiae 2603V/R]                         | neuC | 5.00E-65 | 6.00E-64 | 5.00E-65 | *1E-79    | *1E-79    | 5.00E-65 |
| O | Perosamine synthetase [LPS] [Brucella melitensis]                                             | per  | 8.00E-55 | 8.00E-55 | 1.00E-54 | 6.00E-156 | 4.00E-160 | 8.00E-55 |
| O | UDP-N-acetylglucosamine 4,6-dehydratase[Helicobacter pylori 26695]                            | pseB | 8.00E-66 | 8.00E-66 | 7.00E-66 | *2E-97    | *2E-97    | 8.00E-66 |
| O | C4 aminotransferase [Campylobacter jejuni subsp. jejuni NCTC 11168]                           | pseC | N        | N        | N        | *4E-65    | *4E-65    | N        |
| O | N-acetylneuraminic acid synthetase[Campylobacter jejuni.]                                     | psel | 8.00E-52 | 6.00E-52 | 8.00E-52 | *8E-65    | *7E-65    | 8.00E-52 |
| D | DNA repair protein RecN [RecN] [Neisseria meningitidis]                                       | recN | 7.00E-66 | 7.00E-66 | 7.00E-66 | 7.00E-66  | 7.00E-66  | 7.00E-66 |
| R | probable GTP pyrophosphokinase RelA [Mycobacterium tuberculosis]                              | relA | e-149    | e-149    | e-149    | e-149     | e-149     | e-149    |
| O | ADP-L-glycero-D-mannoheptose-6-epimerase [Haemophilus influenzae ]                            | rfaD | 2.00E-57 | 4.00E-58 | 4.00E-58 | 4.00E-58  | 3.00E-57  | 1.00E-57 |
| O | dTDP-glucose 46-dehydratase [LOS] [Haemophilus influenzae ]                                   | rffG | 2.00E-97 | 2.00E-97 | 2.00E-97 | 2.00E-97  | 1.00E-97  | 2.00E-97 |
| N | sphingomyelinase-c [SMase] [Listeria ivanovii ]                                               | smcL | 1.00E-59 | 1.00E-59 | 2.00E-59 | 1.00E-59  | 1.00E-59  | 1.00E-59 |
| N | sphingomyelinase-c [SMase] [Listeria ivanovii ]                                               | smcL | 1.00E-69 | 1.00E-69 | 4.00E-69 | 1.00E-69  | 1.00E-69  | 1.00E-69 |

|   |                                                                                        |                  |           |          |          |          |          |          |
|---|----------------------------------------------------------------------------------------|------------------|-----------|----------|----------|----------|----------|----------|
| O | general secretion pathway protein F [ <i>Pseudomonas aeruginosa</i> ]                  | <i>xcpS</i>      | 2.00E-56  | 2.00E-56 | 2.00E-56 | 2.00E-56 | 2.00E-56 | 2.00E-56 |
| O | phosphomannomutase [LOS] [ <i>Haemophilus influenzae</i> ]                             | <i>yhxB/manB</i> | 1.00E-62  | 6.00E-63 | 6.00E-63 | 2.00E-62 | 6.00E-63 | 2.00E-65 |
| O | beta-hemolysin [-hemolysin] [ <i>Staphylococcus aureus</i> ]                           | <i>hlyB</i>      | 2.00E-62  | 2.00E-57 | 2.00E-62 | 2.00E-62 | 2.00E-57 | 2.00E-57 |
| O | beta-hemolysin [-hemolysin] [ <i>Staphylococcus aureus</i> subsp. <i>aureus</i> COL]   | <i>hlyB</i>      | 3.00E-55  | 3.00E-55 | 3.00E-55 | 6.00E-52 | 3.00E-55 | 3.00E-55 |
| O | hemolysin transport protein [Hemolysin] [ <i>Escherichia coli</i> O157:H7 str. EDL933] | <i>hlyB</i>      | 2.00E-56  | 2.00E-56 | 8.00E-56 | 2.00E-56 | 2.00E-56 | 2.00E-56 |
| O | Hsp60, 60K heat shock protein HtpB [Hsp60] [ <i>Legionella pneumophila</i> ]           | <i>htpB</i>      | 1.00E-169 | e-169    | e-169    | e-169    | e-169    | e-169    |
| O | catalase [KatA] [ <i>Neisseria meningitidis</i> MC58]                                  | <i>katA</i>      | e-157     | e-157    | e-157    | e-157    | e-157    | e-157    |
| O | 2-dehydro-3-deoxyphosphooctonate aldolase [LPS] [ <i>Brucella melitensis</i> ]         | <i>kdsA</i>      | 1.00E-71  | 1.00E-71 | 1.00E-71 | 1.00E-71 | 1.00E-71 | 1.00E-71 |
| O | D-arabinose 5-phosphate isomerase [ <i>Campylobacter jejuni</i> ]                      | <i>kpsF</i>      | 5.00E-61  | 5.00E-61 | 5.00E-61 | 2.00E-61 | 1.00E-60 | 2.00E-61 |
| O | UDP-N-acetylglucosamine acyltransferase [ <i>Haemophilus influenzae</i> ]              | <i>lpxA</i>      | 2.00E-53  | 2.00E-53 | 2.00E-53 | 2.00E-53 | 2.00E-53 | 2.00E-53 |
| O | lipid-A-disaccharide synthase [LOS] [ <i>Haemophilus influenzae</i> ]                  | <i>lpxB</i>      | 1.00E-53  | 1.00E-53 | 2.00E-53 | 2.00E-53 | 1.00E-53 | 2.00E-53 |
| O | UDP-3-O-N-acetylglucosamine deacetylase [ <i>Haemophilus influenzae</i> ]              | <i>lpxC</i>      | 9.00E-53  | 9.00E-53 | 9.00E-53 | 9.00E-53 | 9.00E-53 | 9.00E-53 |
| N | Mg2+ transport protein [MgtBC] [ <i>Salmonella enterica</i> ]                          | <i>mgtB</i>      | e-133     | e-147    | e-147    | e-147    | e-146    | e-146    |
| O | lipid transporter ATP-binding/permease [LOS] [ <i>Haemophilus influenzae</i> ]         | <i>msbA</i>      | 3.00E-88  | 2.00E-88 | 8.00E-88 | 3.00E-88 | 3.00E-88 | 3.00E-88 |
| O | lipid transporter ATP-binding/permease [LOS] [ <i>Haemophilus influenzae</i> ]         | <i>msbA</i>      | 5.00E-84  | 4.00E-84 | 4.00E-84 | 4.00E-84 | 5.00E-84 | 4.00E-84 |
| D | multiple transferable resistance system protein MtrD [ <i>Neisseria meningitidis</i> ] | <i>mtrD</i>      | 2.00E-56  | 5.00E-54 | 2.00E-54 | 2.00E-56 | 2.00E-56 | 2.00E-69 |
| D | multiple transferable resistance system protein MtrD [ <i>Neisseria meningitidis</i> ] | <i>mtrD</i>      | 5.00E-56  | 2.00E-56 | e-56     | 5.00E-54 | 5.00E-54 | 1.00E-91 |
| D | multiple transferable resistance system protein MtrD [ <i>Neisseria meningitidis</i> ] | <i>mtrD</i>      | 2.00E-69  | 1.00E-69 | 5.00E-92 | 2.00E-69 | 2.00E-69 | 5.00E-54 |
| D | multiple transferable resistance system protein MtrD [ <i>Neisseria meningitidis</i> ] | <i>mtrD</i>      | 9.00E-92  | 7.00E-92 | 5.00E-92 | 1.00E-91 | 1.00E-91 | 2.00E-56 |
| D | N-acetyl neuramic acid synthetase NeuB [Capsule][ <i>Streptococcus agalactiae</i> ]    | <i>neuB</i>      | 5.00E-93  | 5.00E-93 | 5.00E-93 | 7.00E-53 | 7.00E-53 | 5.00E-93 |

|   |                                                                                     |                  |          |          |          |           |           |          |
|---|-------------------------------------------------------------------------------------|------------------|----------|----------|----------|-----------|-----------|----------|
| D | N-acetyl neuramic acid synthetase NeuB [Capsule][ <i>Streptococcus agalactiae</i> ] | <i>neuB</i>      | N        | N        | N        | *2E-91    | *2E-91    | N        |
| D | UDP-N-acetylglucosamine-2-epimerase NeuC [ <i>Streptococcus agalactiae</i> 2603V/R] | <i>neuC</i>      | 5.00E-65 | 6.00E-64 | 5.00E-65 | *1E-79    | *1E-79    | 5.00E-65 |
| O | Perosamine synthetase [LPS] [ <i>Brucella melitensis</i> ]                          | <i>per</i>       | 8.00E-55 | 8.00E-55 | 1.00E-54 | 6.00E-156 | 4.00E-160 | 8.00E-55 |
| O | UDP-N-acetylglucosamine 4,6-dehydratase [ <i>Helicobacter pylori</i> ]              | <i>pseB</i>      | 8.00E-66 | 8.00E-66 | 7.00E-66 | *2E-97    | *2E-97    | 8.00E-66 |
| O | C4 aminotransferase [ <i>Campylobacter jejuni</i> ]                                 | <i>pseC</i>      | N        | N        | N        | *4E-65    | *4E-65    | N        |
| O | N-acetylneuraminic acid synthetase [ <i>Campylobacter jejuni</i> ]                  | <i>psel</i>      | 8.00E-52 | 6.00E-52 | 8.00E-52 | *8E-65    | *7E-65    | 8.00E-52 |
| D | DNA repair protein RecN [RecN] [ <i>Neisseria meningitidis</i> ]                    | <i>recN</i>      | 7.00E-66 | 7.00E-66 | 7.00E-66 | 7.00E-66  | 7.00E-66  | 7.00E-66 |
| R | probable GTP pyrophosphokinase [ <i>Mycobacterium tuberculosis</i> ]                | <i>relA</i>      | e-149    | e-149    | e-149    | e-149     | e-149     | e-149    |
| O | ADP-L-glycero-D-mannoheptose-6-epimerase [ <i>Haemophilus influenzae</i> ]          | <i>rfaD</i>      | 2.00E-57 | 4.00E-58 | 4.00E-58 | 4.00E-58  | 3.00E-57  | 1.00E-57 |
| O | dTDP-glucose 46-dehydratase [LOS] [ <i>Haemophilus influenzae</i> ]                 | <i>rffG</i>      | 2.00E-97 | 2.00E-97 | 2.00E-97 | 2.00E-97  | 1.00E-97  | 2.00E-97 |
| N | sphingomyelinase-c [SMase] [ <i>Listeria ivanovii</i> ]                             | <i>smcL</i>      | 1.00E-59 | 1.00E-59 | 2.00E-59 | 1.00E-59  | 1.00E-59  | 1.00E-59 |
| N | sphingomyelinase-c [SMase] [ <i>Listeria ivanovii</i> ]                             | <i>smcL</i>      | 1.00E-69 | 1.00E-69 | 4.00E-69 | 1.00E-69  | 1.00E-69  | 1.00E-69 |
| O | general secretion pathway protein F [ <i>Pseudomonas aeruginosa</i> ]               | <i>xcpS</i>      | 2.00E-56 | 2.00E-56 | 2.00E-56 | 2.00E-56  | 2.00E-56  | 2.00E-56 |
| O | phosphomannomutase [LOS] [ <i>Haemophilus influenzae</i> ]                          | <i>yhxB/manB</i> | 1.00E-62 | 6.00E-63 | 6.00E-63 | 2.00E-62  | 6.00E-63  | 2.00E-65 |

N, blast result  $\geq$  e-value 1e-52 or score of alignment  $\leq$  200 (ie. not significant)

\*Similarities found only between 1489 and 1548

Green (D) defensive virulence factors; red (O) offensive virulence factors; pink (R) regulatory; yellow (N) nonspecific.
