# Supplementary material for: Complete Genome Sequencing of Leptospira interrogans Isolates from Malaysia Reveals Massive Genome Rearrangement but High Conservation of Virulence-Associated Genes
Source: MDPI journal article supplement (doi:10.3390/pathogens10091198), 2021-09-15
Supplement: s1 [file s1]

**Table S10. Identification and distribution of plasmids in five isolates of *L. interrogans*.**

Same plasmids are identified by same colors. Plasmids were not identified in strain 898.

|                 | Replicon  | Size (bp) | Blastn                                                                      | Score (%) | E-value | Partitioning system |
|-----------------|-----------|-----------|-----------------------------------------------------------------------------|-----------|---------|---------------------|
| <b>Langkawi</b> | Chr 1     | 437462    | <i>L. interrogans</i> serovar <i>Hardjo</i> str. Norma chromosome 1         | 99%       | 0       |                     |
|                 | Chr 2     | 395410    | <i>L. interrogans</i> serovar <i>Hardjo</i> str. Norma chromosome 2         | 99%       | 0       |                     |
|                 | Plasmid 1 | 63414     | <i>L. interrogans</i> serovar <i>Lai</i> str. 56601 plasmid Laicp           | 99%       | 0       | parB                |
|                 | Plasmid 2 | 59030     | <i>L. interrogans</i> serovar <i>Linhai</i> str. 56609 plasmid Lcp3         | 99%       | 0       | parB                |
| <b>782</b>      | Chr 1     | 4556406   | <i>L. interrogans</i> serovar <i>Lai</i> str. IPAV chromosome 1             | 99        | 0       |                     |
|                 | Chr 2     | 354515    | <i>L. interrogans</i> serovar <i>Copenhageni</i> str. Fiocruz chromosome 2  | 99        | 0       |                     |
|                 | Plasmid 1 | 101385    | <i>L. interrogans</i> serovar <i>Linhai</i> str. 56609 chromosome 1         | 97        | 0       |                     |
|                 | Plasmid 2 | 90872     | <i>L. interrogans</i> serovar <i>Hardjo</i> str. Norma chromosome 1         | 97        | 0       | parB                |
|                 | Plasmid 3 | 74118     | <i>L. interrogans</i> serovar <i>Lai</i> str. 56601 plasmid Laicp           | 99        | 0       |                     |
|                 | Plasmid 4 | 53819     | <i>L. interrogans</i> serovar <i>Linhai</i> str. 56609 plasmid Lcp3         | 91        | 0       | parB                |
|                 | Plasmid 5 | 77059     | <i>L. interrogans</i> serovar <i>Linhai</i> str. 56609 plasmid Lcp1         | 99        | 0       |                     |
| <b>898</b>      | Chr 1     | 4280412   | <i>L. interrogans</i> serovar <i>Copenhageni</i> str. FDAARGOS chromosome 1 | 99        | 0       |                     |
|                 | Chr 2     | 350180    | <i>L. interrogans</i> serovar <i>Copenhageni</i> str. Fiocruz chromosome 2  | 99        | 0       |                     |
| <b>1489</b>     | Chr 1     | 4431091   | <i>L. interrogans</i> serovar <i>Lai</i> str. 56601 chromosome 1            | 99        | 0       |                     |
|                 | Chr 2     | 353717    | <i>L. interrogans</i> serovar <i>Linhai</i> str. 56609 chromosome 2         | 99        | 0       |                     |

|      |           |         |                                                                                         |    |   |      |
|------|-----------|---------|-----------------------------------------------------------------------------------------|----|---|------|
|      | Plasmid 1 | 140106  | <i>L. interrogans</i> serovar <i>Hardjo</i> str.Prajitno chromosome 1                   | 99 | 0 |      |
|      | Plasmid 2 | 83109   | <i>L. interrogans</i> serovar <i>Canicola</i> strain Gui44 plasmid <i>pGui1</i>         | 99 | 0 |      |
|      | Plasmid 3 | 76580   | <i>L. interrogans</i> serovar <i>Bratislava</i> strain PigK151 chromosome 1             | 99 | 0 |      |
|      | Plasmid 4 | 93306   | <i>L. interrogans</i> serovar <i>Linhai</i> str. 56609 plasmid <i>lcp1</i>              | 99 | 0 | parB |
|      | Plasmid 5 | 39186   | <i>L. interrogans</i> serovar <i>Hardjo</i> str.Norma chromosome 1                      | 99 | 0 | parB |
|      | Plasmid 6 | 62980   | <i>L. interrogans</i> serovar <i>Linhai</i> str. 56609 plasmid <i>lcp2</i>              | 99 | 0 | parB |
|      | Plasmid 7 | 69692   | <i>L. interrogans</i> serovar <i>Canicola</i> strain Gui44 plasmid <i>pGui1</i>         | 99 | 0 |      |
| 1548 | Chr 1     | 435484  | <i>L. interrogans</i> serovar <i>Lai</i> str. IPAV chromosome 1                         | 99 | 0 |      |
|      | Chr 2     | 393564  | <i>L. interrogans</i> serovar <i>Copenhageni</i> str. FDAARGOS 203 plasmid              | 99 | 0 |      |
|      | Plasmid 1 | 80435   | <i>L. interrogans</i> serovar <i>Manilae</i> str. UP-MMC-NIID-LP plasmid <i>pLIMLP1</i> | 99 | 0 |      |
|      | Plasmid 2 | 51265   | <i>L. interrogans</i> serovar <i>Linhai</i> str. 56609 chromosome 1                     | 99 | 0 | parB |
| 1530 | Chr 1     | 9684    | <i>L. interrogans</i> serovar <i>Copenhageni</i> str. FDAARGOS chromosome 1             | 99 | 0 |      |
|      | Chr 1     | 4318326 | <i>L. interrogans</i> serovar <i>Hardjo</i> str.Prajitno chromosome 2                   | 99 | 0 |      |
|      | Chr 2     | 349777  | <i>L. interrogans</i> serovar <i>Linhai</i> str. 56609 chromosome 2                     | 99 | 0 |      |
|      | Unitig 58 | 91738   | <i>L. interrogans</i> serovar <i>Linhai</i> str. 56609 plasmid <i>lcp2</i>              | 99 | 0 | parB |
|      | Unitig 59 | 82644   | <i>L. interrogans</i> serovar <i>Hardjo</i> str.Norma chromosome 1                      | 99 | 0 | parB |
|      | Unitig 60 | 52032   | <i>L. interrogans</i> serovar <i>Linhai</i> str. 56609 chromosome 1                     | 99 | 0 |      |

|            |       |                                                                                 |    |   |      |
|------------|-------|---------------------------------------------------------------------------------|----|---|------|
| Unitig 61  | 54623 | <i>L. interrogans</i> serovar <i>Canicola</i> strain Gui44 plasmid <i>pGui1</i> | 99 | 0 | parB |
| Unitig 62  | 52974 | <i>L. interrogans</i> serovar <i>Linhai</i> str. 56609 plasmid <i>lcp3</i>      | 99 | 0 | parB |
| Unitig 103 | 2169  | <i>L. interrogans</i> serovar <i>Lai</i> str. IPAV chromosome 1                 | 99 | 0 |      |

Chr, chromosome
