# Supplementary material for: Complete Genome Sequencing of Leptospira interrogans Isolates from Malaysia Reveals Massive Genome Rearrangement but High Conservation of Virulence-Associated Genes
Source: Pathogens. 2021 Sep 15;10(9):1198. doi: 10.3390/pathogens10091198 (PMC8467490; doi:10.3390/pathogens10091198)
Supplement: Supplementary file 1 [file pathogens-10-01198-s001.zip]

Archive with 17 entries (17 files):
- Figure S1_140921_edited.pdf
- Figure S2_140921.pdf
- Table S1_fp2.pdf
- Table S10_fp.pdf
- Table S11_fp2.pdf
- Table S12_fp2.pdf
- Table S13_fp2.pdf
- Table S14_fp2.pdf
- Table S15_fp2.pdf
- Table S2_fp2.pdf
- Table S3_SR_fp (1).pdf
- Table S4_fp2.pdf
- Table S5_fp2.pdf
- Table S6_fp2.pdf
- Table S7_fp2.pdf
- Table S8_fp2.pdf
- Table S9_fp2SR2_fp (1).pdf
